# Supplementary material
Source: publisher site journal article supplement (https://static.cambridge.org/content/id/urn:cambridge.org:id:article:S1041610219001091/resource/name/S1041610219001091supp003.docx)
Supplement: Supplementary file 1 [file S1041610219001091supp003.docx]

Supplementary figure S2 contains two figures.

Heading: IADL-x and IADL scores in CN participants demonstrating the normal distribution of the IADL-x scale contrary to the IADL scale
